# Supplementary material for: Politicization of COVID-19 and Conspiratorial Beliefs Among Emergency & Public Health Officials
Source: publisher site journal article supplement (doi:10.1515/jhsem-2021-0072), 2023-08-10
Supplement: Supplementary file 1 [file j_jhsem_2021-0072_suppl_001.docx]

**Appendix**

**Survey Questions: COVID-19 and Emergency Management**

1. Please indicate the country/nation in which you live.
2. Please indicate the state or province.
3. Please indicate your age
4. How many years have you been working in emergency management?
5. Please indicate your gender identity
6. Please indicate your race/ethnicity
7. Please indicate your highest level of education:
8. How would you describe your political ideology? (drop down, moderate, conservative, liberal, other)
9. Please indicate your level of involvement in emergency management (select all that apply):
   1. Volunteer at local level
   2. Volunteer at state/province level
   3. Volunteer at national level
   4. Volunteer at international level
   5. Local first responder (police, fire, or EMS)
   6. State level emergency manager
   7. National level emergency manager
   8. Retired
   9. Academic who studies emergency management
   10. Public health or medical professional
   11. Training to become first responder
   12. Training to become emergency management practitioner
   13. Emergency management consultant
   14. Other (indicate)
10. Please indicate what you perceive as the **most serious threat** to your local community (select top three):
    1. Wildfires
    2. Hurricanes/cyclones/tropical storms
    3. COVID-19 and other infectious diseases
    4. Famine or hunger
    5. Conflict or political violence
    6. Earthquakes
    7. Tornadoes
    8. Freshwater flooding
    9. Severe heat
    10. Winter storms
    11. Oil or chemical spills (please indicate)
11. What are the **main ways** in which you gather news **daily** (select all that apply):
    1. Television cable news
    2. Internet news articles
    3. Social media news shared by friends and peers
    4. Radio news
    5. Printed newspaper
    6. Word of mouth or telephone calls from peers
    7. Text alerts from an app
    8. Other: _____
12. What are the main ways in which you gather news **during a disaster or crisis event** (select all that apply):
    1. Television cable news
    2. Internet news articles
    3. Social media news shared by friends and peers
    4. Podcasts
    5. Radio news
    6. Printed newspaper
    7. Word of mouth or telephone calls from peers
    8. Text alerts from an app
    9. Situation reports from emergency management meetings
    10. Other: ______
13. What are the **news sources** that you **trust** **the most in regard to COVID-19**? (open-ended)
14. In your opinion, what group of people or groups of people in your local community have the most urgent needs during COVID-19?
15. **Please indicate your level of agreement with the following statements using a scale of do not agree to very much agree (1-5)**
16. The number of COVID-19 deaths in my nation have likely been **overreported.**
17. The number of COVID-19 deaths in my nation have likely been **underreported**.
18. The number of COVID-19 deaths in my nation have likely been **accurate.**
19. The physical distancing measures in my community are necessary to slow or mitigate the spread of COVID-19.
20. The physical distancing measures in my community are **not** necessary to slow or mitigate the spread of COVID-19.
21. Community questions about false health information should be managed and dispelled by emergency managers.
22. Community questions about false health information should **not** be managed or dispelled by emergency managers.

**Please indicate your level of agreement with the following statements using a scale of do not agree to very much agree (1-5)**

1. The rapid spread of certain viruses and/or diseases is the result of the deliberate, concealed efforts of some organization.
2. The government withholds a lot of information about diseases and their treatments from the public.
3. Groups of scientists deliberately attempt to create panic about future risks because it is in their interests to do so.
4. Groups of scientists ensure that only evidence which supports a pre-determined conclusion is made known to the public.
5. Government funded scientists manipulate evidence in order to support existing government policy.
6. The media ensures that only certain information is made known to the public.
7. Viruses and/or diseases have been deliberately disseminated to infect certain populations.
8. The government keeps many important secrets from the public.
9. The government has staged important societal events in order to manipulate voters.

Please answer the following:

1. During the lockdowns associated with COVID-19 in your local area, what has been the biggest **challenge** for your organization in terms of **response**?
2. During the lockdowns associated with COVID-19 in your local area, what do you think will be the biggest **challenge** for your organization in terms of **recovery**?
3. What has been the **biggest success** for your organization or community during COVID-19?
4. How has COVID-19 changed planning in your group or organization for the upcoming hurricane and or wildfire season?
5. Is there anything else you would like to share about your perceptions and experience in managing COVID-19?
